# Supplementary material
Source: publisher figshare collection journal article supplement (https://gsapubs.figshare.com/ndownloader/files/24099179)
Supplement: Supplementary file 1 [file 24099179]

## Sheet: Sheet1
Table A2. Fault gouge XRD results. Note that where are no data for a particular fraction, it is because there was too little material for both XRD and K-Ar analysis, and K-Ar analysis was prioritized.
PP ( 63-10 μm)	Qtz	Kfs	ill (Ms)	Kln	Sm	Cal	Dol	Sd	Gt	Hem	Jar	Py	GoF
HC	44	7	25	15	6					1	1	1	2.07
SC	16		68	tr	11				3		2		3.27
MC	1		98	tr						1			4.55
RVD-18-21 557.26	18		65	7			7	2		tr		1	2.36
Smear 63-10 µm	Qtz	Kfs	ill (Ms)	Kln	Sm	Cal	Dol	Sd	Gt	Hem	Jar	Py
HC	21	13	42	21	3					tr	tr
SC	14		78	1	7				tr		tr
MC	tr		99	tr						1
RVD-18-21 557.26	11		72	15			2					tr
Smear 10-6 µm,	Qtz	Kfs	ill (Ms)	Kln	Sm	Cal	Dol	Sd	Gt	Hem	Jar	Py
HC	5	2	45	39	9						tr
SC	5		81	2	12						tr
MC	tr		98	2							tr
RVD-18-21 557.26	9		76	14			1					tr
Smear 6-2 µm	Qtz	Kfs	ill (Ms)	Kln	Sm	Cal	Dol	Sd	Gt	Hem	Jar	Py
HC	4	1	34	53	8						tr
SC	3		74	5	18						tr
MC			98	2
RVD-18-21 557.26	1		85	14		tr
Smear 2-0.6 µm	Qtz	Kfs	ill (Ms)	Kln	Sm	Cal	Dol	Sd	Gt	Hem	Jar	Py
HC	4	2	28	54	11						tr
SC			51	4	44						1
MC			99	1
RVD-18-21 557.26			86	14
Smear 0.6-0.2µm	Qtz	Kfs	ill (Ms)	Kln	Sm	Cal	Dol	Sd	Gt	Hem	Jar	Py
HC	11		22	44	23
SC			33	1	58				5		3
MC			99	1
RVD-18-21 557.26			91	9		tr
Smear <0.2µm	Qtz	Kfs	ill (Ms)	Kln	Sm	Cal	Dol	Sd	Gt	Hem	Jar	Py
HC
SC			48		42				9		1
MC
RVD-18-21 557.26			98	1		1
Mineral abbreviations:
Qtz: quartz, Kfs: K-feldspar, Ill: illite, Kln: kaolinite, Sm: smectite, Cal: calcite, Dol: dolomite, Sd: siderite,
Gt: goethite, Hem: hematite, Jar: jarosite, Py: pyrite, tr: trace, GoF: goodness of fit
Grey font - insufficient material for XRD analysis

## Sheet: G47778
Mottram, C.M., et al., 2020, Syncing fault rock clocks: Direct comparison of U-Pb carbonate and K-Ar illite fault dating methods: Geology, v. 48, https://doi.org/10.1130/G47778.1
